# Supplementary material for: Analysis of the TCGA Dataset Reveals that Subsites of Laryngeal Squamous Cell Carcinoma Are Molecularly Distinct
Source: PubMed Central journal article supplement (PMC7794818; doi:10.3390/cancers13010105), 2020-12-31
Supplement: cancers-13-00105-s001.pdf [file cancers-13-00105-s001.pdf]

## Supplementary Materials: Analysis of the TCGA Dataset Reveals that Subsites of Laryngeal Squamous Cell Carcinoma are Molecularly Distinct

Alana Sorgini, Hugh Andrew Jinwook Kim, Peter YF Zeng, Mushfiq Hassan Shaikh, Neil Mundi, Farhad Ghasemi, Eric Di Gravio, Halema Khan, Danielle MacNeil, Mohammed Imran Khan, Adrian Mendez, John Yoo, Kevin Fung, Pencilla Lang, David A. Palma, Joe S. Mymryk, John W. Barrett, Krupal B. Patel, Paul C. Boutros and Anthony C. Nichols

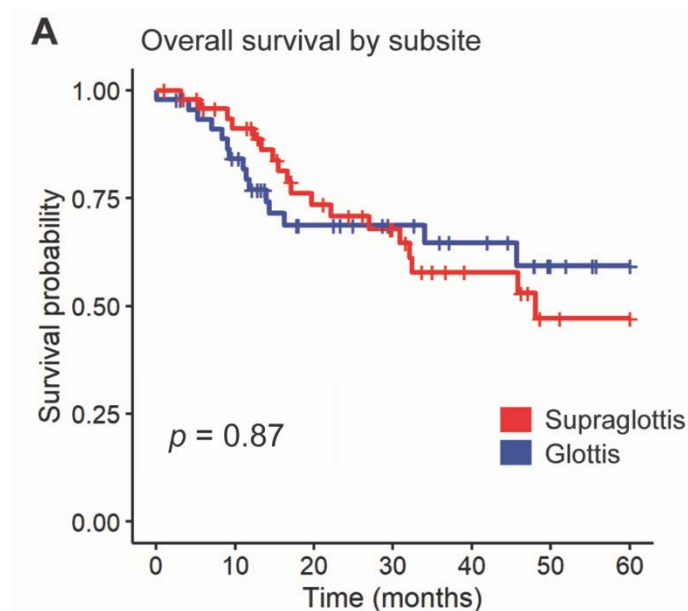

**Figure S1.** Kaplan-Meier curves for overall survival between supraglottic and glottic LSCC. A log-rank test was used to compare the Kaplan-Meier curves between tumors of the glottis and supraglottis.

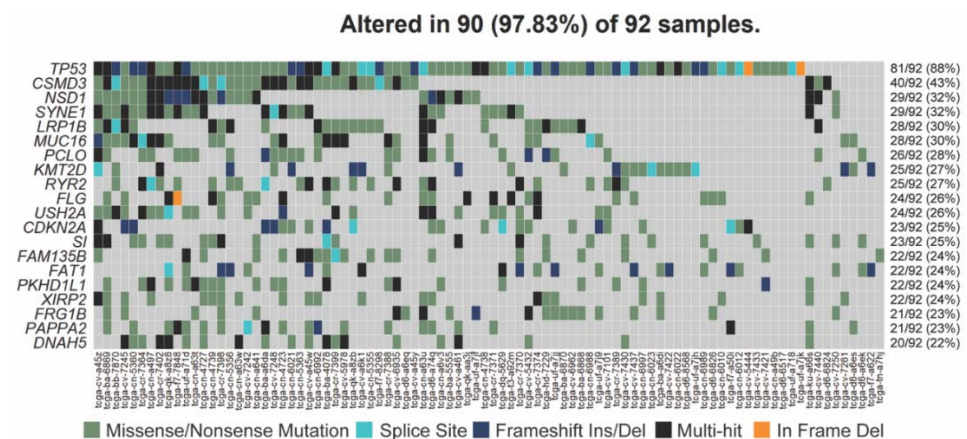

**Figure S2.** Top 20 genes by SNV frequency in the combined TCGA LSCC cohort. TCGA sample IDs, absolute number and frequency for each mutation are included.

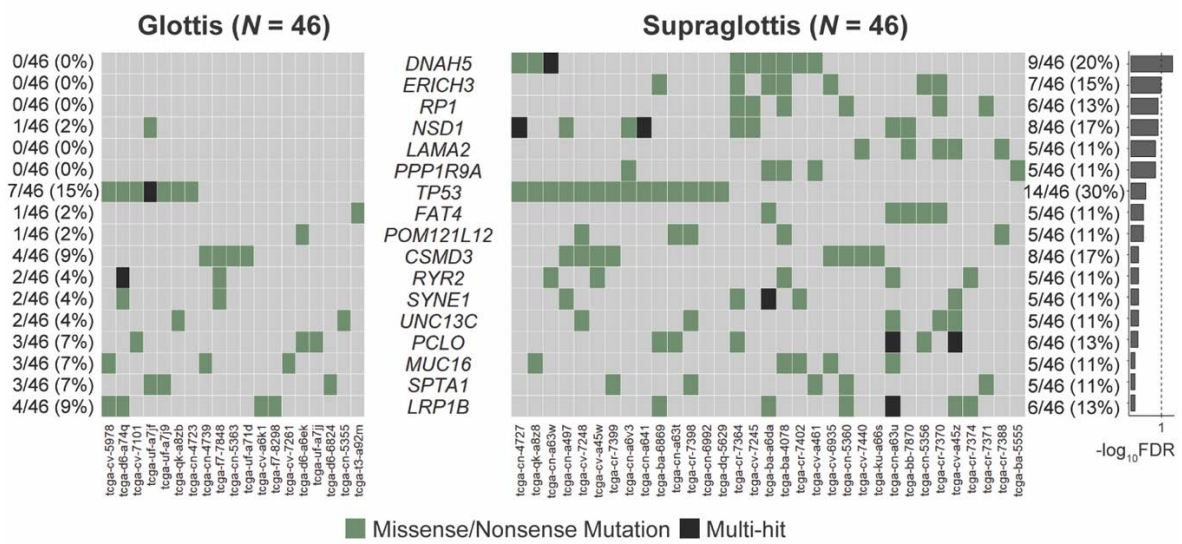

**Figure S3.** Genes with differing SNV mutation frequencies between supraglottic and glottic LSCC by G > T mutation load. FDR = false discovery rate.

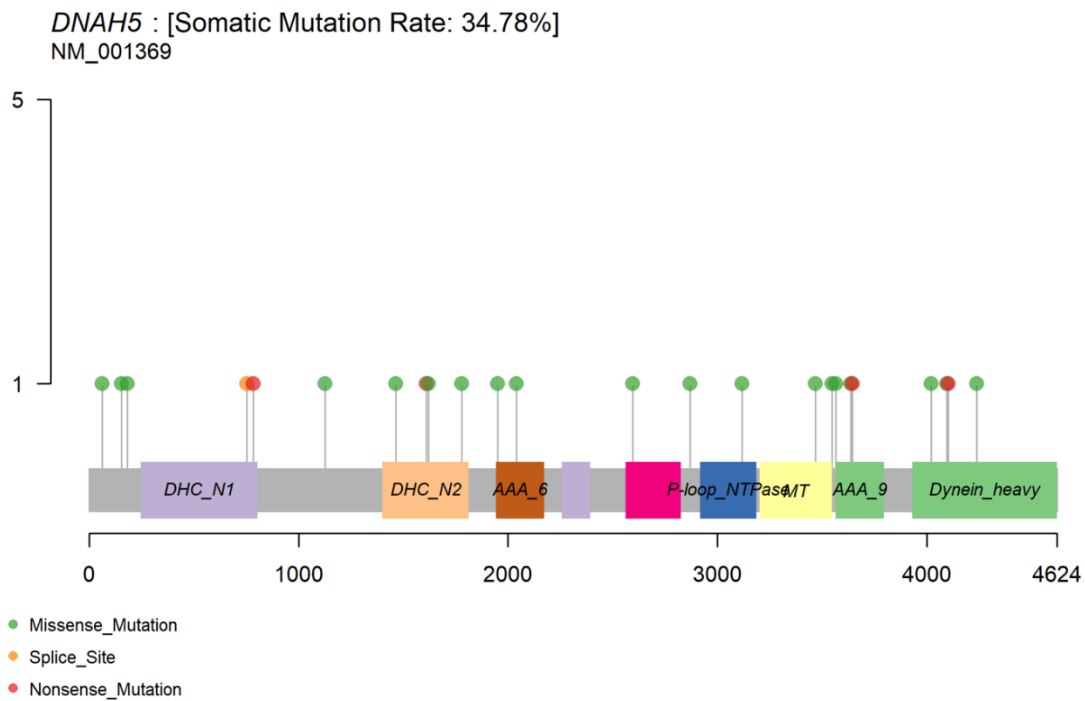

**Figure S4.** Lollipop plot of SNVs in *DNAH5*.

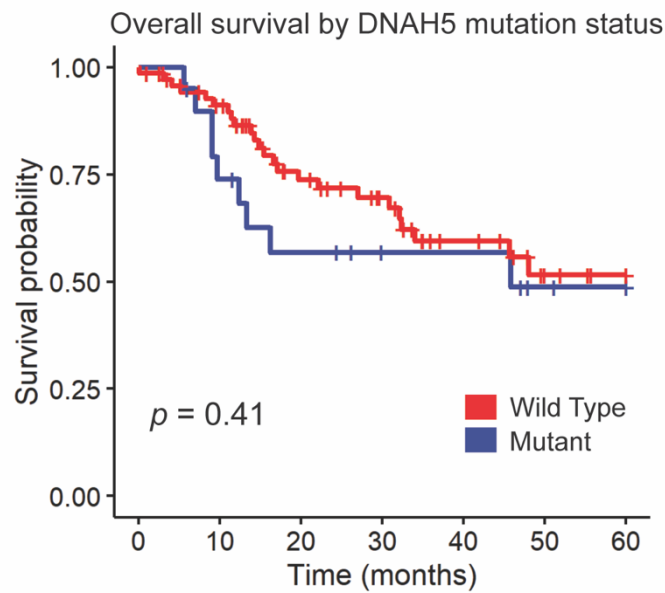

**Figure S5.** Kaplan-Meier curves for overall survival by *DNAH5* SNV mutation status. A log-rank test was used to compare the Kaplan-Meier curves between tumors with wild-type and mutant alleles.

### Volcano plot

EnhancedVolcano

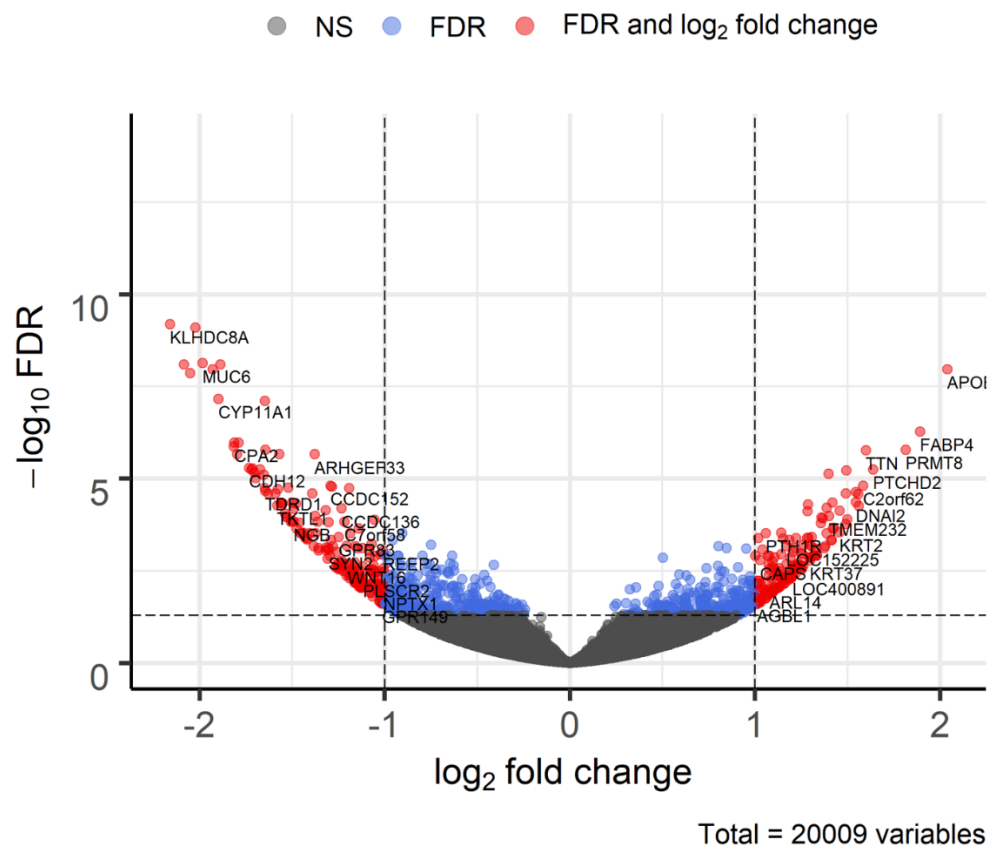

**Figure S6.** Volcano plot for mRNA abundance between glottic and supraglottic LSCC. 282 genes were found to have significant FDR-corrected significance values and greater than two-fold

change in transcript levels between glottic and supraglottic tumors. Genes with positive log<sub>2</sub> fold change are more abundant in glottis, and vice versa.

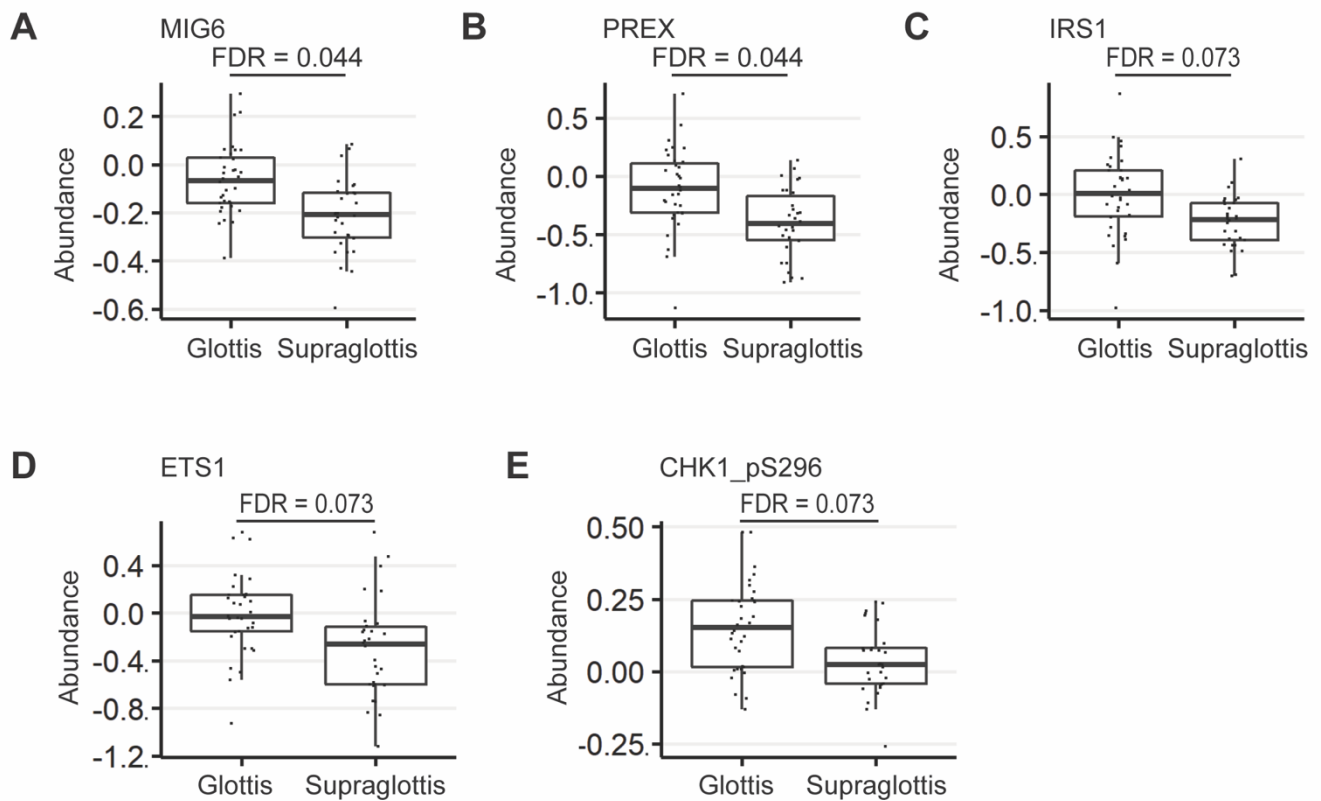

**Figure S7.** Differentially abundant proteins between supraglottic and glottic LSCC. Mann-Whitney U test was used to compare median protein abundance levels, and FDR correction was done using Benjamini-Hochberg method.

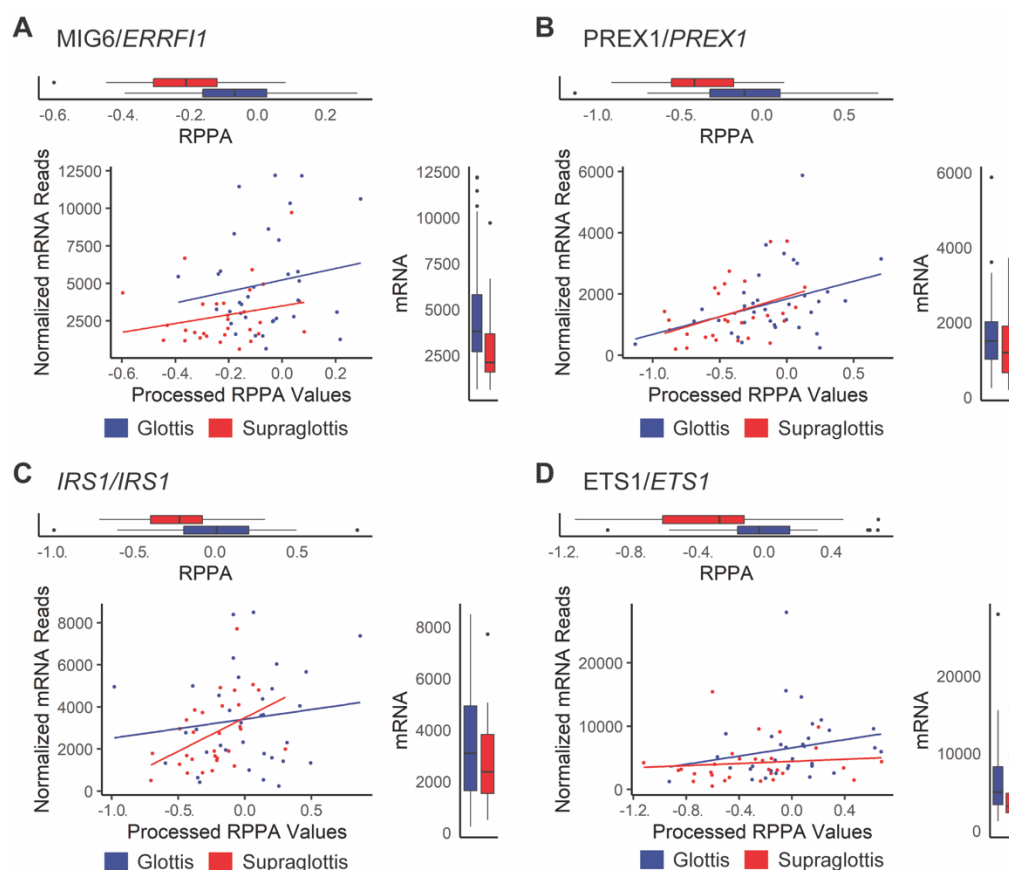

**Figure S8.** Four most differentially abundant proteins between supraglottic and glottic LSCC correlated with mRNA levels. Significance determined by FDR < 0.1 and positive Spearman's correlation. (A) ERRF1 ( $\rho = 0.27$ , FDR = 0.046), (B) PREX1 ( $\rho = 0.41$ , FDR = 0.0028), (C) IRS1 ( $\rho = 0.26$ , FDR = 0.046), (D) ETS1 ( $\rho = 0.40$ , FDR = 0.0028).

**Table S1.** Multivariate analysis of overall survival. Backward selection was used to attain the multivariate model. No multivariate model could be created in this way for progression-free survival.

| Variables             |                          | HPV-negative     |                   |                   |                   |
|-----------------------|--------------------------|------------------|-------------------|-------------------|-------------------|
|                       |                          | Univariate       |                   | Multivariate      |                   |
|                       |                          | HR (95% CI)      | <i>p</i> Value    | HR (95% CI)       | <i>p</i> Value    |
| Age                   | Mean                     | 1.00 (0.96–1.04) | 0.96              |                   |                   |
| Sex                   | Male vs. Female          | 0.24 (0.12–0.50) | <10 <sup>-3</sup> | 0.17 (0.069–0.43) | <10 <sup>-3</sup> |
| Smoking history       | Heavy vs. Light/None     | 0.30 (0.11–0.85) | 0.023             | 0.19 (0.063–0.59) | <b>0.0039</b>     |
| T-category            | T4 vs. T2-T3             | 0.81 (0.37–1.8)  | 0.61              |                   |                   |
| N-category            | N1-N3 vs. N0             | 3.2 (1.3–8.4)    | 0.016             |                   |                   |
| Overall stage         | IV vs. I-III             | 0.86 (0.37–2.0)  | 0.72              |                   |                   |
| Adjuvant radiotherapy | Yes vs. No               | 0.69 (0.29–1.6)  | 0.40              |                   |                   |
| Subsite               | Supraglottis vs. Glottis | 1.2 (0.59–2.3)   | 0.66              | 2.7 (1.1–6.5)     | <b>0.024</b>      |
| Cartilage invasion    | Positive vs. Negative    | 0.67 (0.31–1.5)  | 0.31              |                   |                   |
| NSD1 mutation status  | Mutant vs. Wild-type     | 0.34 (0.14–0.82) | 0.016             | 0.34 (0.12–0.95)  | <b>0.039</b>      |

**Table S2.** List of genes with significantly different mRNA abundance or SNV frequencies between glottic and supraglottic LSCC. Significance cutoffs were < 0.01 and absolute fold change > 2 for mRNA and FDR < 0.1 SNV comparisons.

| Gene    | Log <sub>2</sub> Fold Change or Odds Ratio | <i>p</i> Value          | FDR                    | Mutation Difference              |
|---------|--------------------------------------------|-------------------------|------------------------|----------------------------------|
| APOBEC2 | 2.0                                        | 3.9 × 10 <sup>-12</sup> | 1.1 × 10 <sup>-8</sup> | higher mRNA abundance in glottis |
| FABP4   | 1.9                                        | 3.0 × 10 <sup>-10</sup> | 5.2 × 10 <sup>-7</sup> | higher mRNA abundance in glottis |
| PRMT8   | 1.8                                        | 1.4 × 10 <sup>-9</sup>  | 1.6 × 10 <sup>-6</sup> | higher mRNA abundance in glottis |
| TTN     | 1.6                                        | 1.5 × 10 <sup>-9</sup>  | 1.7 × 10 <sup>-6</sup> | higher mRNA abundance in glottis |

| PTCHD2    | 1.6                            | $6.9 \times 10^{-9}$ | $5.6 \times 10^{-6}$ | higher mRNA abundance in glottis |
|-----------|--------------------------------|----------------------|----------------------|----------------------------------|
| DHRS2     | 1.5                            | $8.2 \times 10^{-9}$ | $5.9 \times 10^{-6}$ | higher mRNA abundance in glottis |
| MYOM1     | 1.4                            | $1.1 \times 10^{-8}$ | $7.3 \times 10^{-6}$ | higher mRNA abundance in glottis |
| C2orf62   | 1.6                            | $2.6 \times 10^{-8}$ | $1.5 \times 10^{-5}$ | higher mRNA abundance in glottis |
| VWA3B     | 1.5                            | $4.7 \times 10^{-8}$ | $2.3 \times 10^{-5}$ | higher mRNA abundance in glottis |
| ZMYND10   | 1.5                            | $5.5 \times 10^{-8}$ | $2.5 \times 10^{-5}$ | higher mRNA abundance in glottis |
| KRT84     | 1.6                            | $5.9 \times 10^{-8}$ | $2.5 \times 10^{-5}$ | higher mRNA abundance in glottis |
| DNAI2     | 1.5                            | $1.0 \times 10^{-7}$ | $4.3 \times 10^{-5}$ | higher mRNA abundance in glottis |
| MURC      | 1.4                            | $1.1 \times 10^{-7}$ | $4.4 \times 10^{-5}$ | higher mRNA abundance in glottis |
| C8orf48   | 1.3                            | $1.4 \times 10^{-7}$ | $4.9 \times 10^{-5}$ | higher mRNA abundance in glottis |
| CDHR4     | 1.6                            | $1.6 \times 10^{-7}$ | $5.5 \times 10^{-5}$ | higher mRNA abundance in glottis |
| CDH15     | 1.4                            | $1.8 \times 10^{-7}$ | $6.1 \times 10^{-5}$ | higher mRNA abundance in glottis |
| RP1       | 1.5                            | $2.3 \times 10^{-7}$ | $7.4 \times 10^{-5}$ | higher mRNA abundance in glottis |
| STEAP4    | 1.3                            | $2.4 \times 10^{-7}$ | $7.5 \times 10^{-5}$ | higher mRNA abundance in glottis |
| TMEM232   | 1.4                            | $3.4 \times 10^{-7}$ | $1.0 \times 10^{-4}$ | higher mRNA abundance in glottis |
| CCDC65    | 1.4                            | $4.0 \times 10^{-7}$ | $1.1 \times 10^{-4}$ | higher mRNA abundance in glottis |
| CLVS1     | 1.4                            | $4.2 \times 10^{-7}$ | $1.2 \times 10^{-4}$ | higher mRNA abundance in glottis |
| SLN       | 1.5                            | $4.6 \times 10^{-7}$ | $1.3 \times 10^{-4}$ | higher mRNA abundance in glottis |
| LRRC50    | 1.4                            | $6.6 \times 10^{-7}$ | $1.6 \times 10^{-4}$ | higher mRNA abundance in glottis |
| CCDC108   | 1.5                            | $7.0 \times 10^{-7}$ | $1.7 \times 10^{-4}$ | higher mRNA abundance in glottis |
| CCK       | 1.4                            | $9.1 \times 10^{-7}$ | $2.2 \times 10^{-4}$ | higher mRNA abundance in glottis |
| CXorf64   | 1.4                            | $9.7 \times 10^{-7}$ | $2.3 \times 10^{-4}$ | higher mRNA abundance in glottis |
| KRT2      | 1.5                            | $1.2 \times 10^{-6}$ | $2.8 \times 10^{-4}$ | higher mRNA abundance in glottis |
| LRRC46    | 1.1                            | $1.3 \times 10^{-6}$ | $3.0 \times 10^{-4}$ | higher mRNA abundance in glottis |
| PTH1R     | 1.1                            | $1.4 \times 10^{-6}$ | $3.0 \times 10^{-4}$ | higher mRNA abundance in glottis |
| SERPINA9  | 1.4                            | $1.4 \times 10^{-6}$ | $3.0 \times 10^{-4}$ | higher mRNA abundance in glottis |
| C2orf40   | 1.3                            | $1.9 \times 10^{-6}$ | $3.9 \times 10^{-4}$ | higher mRNA abundance in glottis |
| CRB1      | 1.3                            | $2.0 \times 10^{-6}$ | $4.0 \times 10^{-4}$ | higher mRNA abundance in glottis |
| FRMPD1    | 1.2                            | $2.1 \times 10^{-6}$ | $4.0 \times 10^{-4}$ | higher mRNA abundance in glottis |
| Gene      | Log2 Fold Change or Odds Ratio | p Value              | FDR                  | Mutation Difference              |
| SLC22A3   | 1.3                            | $2.2 \times 10^{-6}$ | $4.1 \times 10^{-4}$ | higher mRNA abundance in glottis |
| TUSC1     | 1.0                            | $2.2 \times 10^{-6}$ | $4.1 \times 10^{-4}$ | higher mRNA abundance in glottis |
| C6orf97   | 1.2                            | $2.3 \times 10^{-6}$ | $4.2 \times 10^{-4}$ | higher mRNA abundance in glottis |
| VWA3A     | 1.4                            | $2.6 \times 10^{-6}$ | $4.6 \times 10^{-4}$ | higher mRNA abundance in glottis |
| CCDC17    | 1.2                            | $2.6 \times 10^{-6}$ | $4.6 \times 10^{-4}$ | higher mRNA abundance in glottis |
| DNAH12    | 1.4                            | $2.7 \times 10^{-6}$ | $4.7 \times 10^{-4}$ | higher mRNA abundance in glottis |
| MYL4      | 1.3                            | $3.6 \times 10^{-6}$ | $6.1 \times 10^{-4}$ | higher mRNA abundance in glottis |
| ROPN1L    | 1.3                            | $3.8 \times 10^{-6}$ | $6.4 \times 10^{-4}$ | higher mRNA abundance in glottis |
| LOC152225 | 1.2                            | $4.2 \times 10^{-6}$ | $6.8 \times 10^{-4}$ | higher mRNA abundance in glottis |
| RSPH1     | 1.3                            | $4.2 \times 10^{-6}$ | $6.8 \times 10^{-4}$ | higher mRNA abundance in glottis |
| MYOT      | 1.4                            | $4.3 \times 10^{-6}$ | $6.8 \times 10^{-4}$ | higher mRNA abundance in glottis |
| DIO3      | 1.2                            | $4.9 \times 10^{-6}$ | $7.6 \times 10^{-4}$ | higher mRNA abundance in glottis |
| PRB2      | 1.4                            | $5.1 \times 10^{-6}$ | $7.6 \times 10^{-4}$ | higher mRNA abundance in glottis |
| LCE3E     | 1.3                            | $5.3 \times 10^{-6}$ | $7.7 \times 10^{-4}$ | higher mRNA abundance in glottis |
| LRRC6     | 1.0                            | $5.8 \times 10^{-6}$ | $8.3 \times 10^{-4}$ | higher mRNA abundance in glottis |
| WDR63     | 1.2                            | $7.1 \times 10^{-6}$ | $9.7 \times 10^{-4}$ | higher mRNA abundance in glottis |
| KRT10     | 1.2                            | $7.7 \times 10^{-6}$ | $1.0 \times 10^{-3}$ | higher mRNA abundance in glottis |
| FAM166B   | 1.1                            | $8.3 \times 10^{-6}$ | $1.1 \times 10^{-3}$ | higher mRNA abundance in glottis |
| MYH3      | 1.3                            | $8.3 \times 10^{-6}$ | $1.1 \times 10^{-3}$ | higher mRNA abundance in glottis |
| DNAI1     | 1.3                            | $9.0 \times 10^{-6}$ | $1.2 \times 10^{-3}$ | higher mRNA abundance in glottis |
| C11orf66  | 1.0                            | $9.4 \times 10^{-6}$ | $1.2 \times 10^{-3}$ | higher mRNA abundance in glottis |
| MYPN      | 1.3                            | $9.5 \times 10^{-6}$ | $1.2 \times 10^{-3}$ | higher mRNA abundance in glottis |
| CASQ2     | 1.3                            | $9.8 \times 10^{-6}$ | $1.2 \times 10^{-3}$ | higher mRNA abundance in glottis |
| FCAMR     | 1.3                            | $9.9 \times 10^{-6}$ | $1.2 \times 10^{-3}$ | higher mRNA abundance in glottis |

| MT2A      | 1.1                            | $1.0 \times 10^{-5}$ | $1.2 \times 10^{-3}$ | higher mRNA abundance in glottis |
|-----------|--------------------------------|----------------------|----------------------|----------------------------------|
| RSPH9     | 1.1                            | $1.0 \times 10^{-5}$ | $1.2 \times 10^{-3}$ | higher mRNA abundance in glottis |
| MME       | 1.1                            | $1.1 \times 10^{-5}$ | $1.3 \times 10^{-3}$ | higher mRNA abundance in glottis |
| TNNC2     | 1.3                            | $1.1 \times 10^{-5}$ | $1.3 \times 10^{-3}$ | higher mRNA abundance in glottis |
| TMEM190   | 1.3                            | $1.2 \times 10^{-5}$ | $1.4 \times 10^{-3}$ | higher mRNA abundance in glottis |
| HMP19     | 1.2                            | $1.2 \times 10^{-5}$ | $1.4 \times 10^{-3}$ | higher mRNA abundance in glottis |
| CAPS      | 1.0                            | $1.4 \times 10^{-5}$ | $1.6 \times 10^{-3}$ | higher mRNA abundance in glottis |
| KRT37     | 1.3                            | $1.5 \times 10^{-5}$ | $1.7 \times 10^{-3}$ | higher mRNA abundance in glottis |
| HSPA7     | 1.1                            | $1.6 \times 10^{-5}$ | $1.8 \times 10^{-3}$ | higher mRNA abundance in glottis |
| S100A7    | 1.2                            | $1.8 \times 10^{-5}$ | $2.0 \times 10^{-3}$ | higher mRNA abundance in glottis |
| SPEF1     | 1.2                            | $1.9 \times 10^{-5}$ | $2.1 \times 10^{-3}$ | higher mRNA abundance in glottis |
| HSPA6     | 1.1                            | $2.1 \times 10^{-5}$ | $2.2 \times 10^{-3}$ | higher mRNA abundance in glottis |
| ATP1A2    | 1.2                            | $2.1 \times 10^{-5}$ | $2.2 \times 10^{-3}$ | higher mRNA abundance in glottis |
| Gene      | Log2 Fold Change or Odds Ratio | p Value              | FDR                  | Mutation Difference              |
| LCE3D     | 1.2                            | $2.2 \times 10^{-5}$ | $2.2 \times 10^{-3}$ | higher mRNA abundance in glottis |
| MYH1      | 1.2                            | $2.3 \times 10^{-5}$ | $2.3 \times 10^{-3}$ | higher mRNA abundance in glottis |
| CHGB      | 1.3                            | $2.4 \times 10^{-5}$ | $2.3 \times 10^{-3}$ | higher mRNA abundance in glottis |
| CHRNA1    | 1.3                            | $2.4 \times 10^{-5}$ | $2.4 \times 10^{-3}$ | higher mRNA abundance in glottis |
| C5orf49   | 1.2                            | $2.5 \times 10^{-5}$ | $2.4 \times 10^{-3}$ | higher mRNA abundance in glottis |
| NOG       | 1.2                            | $2.6 \times 10^{-5}$ | $2.5 \times 10^{-3}$ | higher mRNA abundance in glottis |
| KCNJ13    | 1.1                            | $2.7 \times 10^{-5}$ | $2.5 \times 10^{-3}$ | higher mRNA abundance in glottis |
| UTS2      | 1.1                            | $2.9 \times 10^{-5}$ | $2.7 \times 10^{-3}$ | higher mRNA abundance in glottis |
| FAM154B   | 1.1                            | $3.0 \times 10^{-5}$ | $2.8 \times 10^{-3}$ | higher mRNA abundance in glottis |
| CADM3     | 1.1                            | $3.1 \times 10^{-5}$ | $2.8 \times 10^{-3}$ | higher mRNA abundance in glottis |
| SNTN      | 1.3                            | $3.2 \times 10^{-5}$ | $2.9 \times 10^{-3}$ | higher mRNA abundance in glottis |
| SPINLW1   | 1.3                            | $3.3 \times 10^{-5}$ | $2.9 \times 10^{-3}$ | higher mRNA abundance in glottis |
| PPP1R3A   | 1.2                            | $3.7 \times 10^{-5}$ | $3.2 \times 10^{-3}$ | higher mRNA abundance in glottis |
| KRT34     | 1.1                            | $3.9 \times 10^{-5}$ | $3.3 \times 10^{-3}$ | higher mRNA abundance in glottis |
| TSPAN19   | 1.2                            | $3.9 \times 10^{-5}$ | $3.3 \times 10^{-3}$ | higher mRNA abundance in glottis |
| LMOD3     | 1.2                            | $4.6 \times 10^{-5}$ | $3.6 \times 10^{-3}$ | higher mRNA abundance in glottis |
| S100A8    | 1.1                            | $4.7 \times 10^{-5}$ | $3.6 \times 10^{-3}$ | higher mRNA abundance in glottis |
| LOC400891 | 1.2                            | $5.6 \times 10^{-5}$ | $4.2 \times 10^{-3}$ | higher mRNA abundance in glottis |
| TEKT1     | 1.1                            | $5.6 \times 10^{-5}$ | $4.2 \times 10^{-3}$ | higher mRNA abundance in glottis |
| SPRR2G    | 1.2                            | $5.7 \times 10^{-5}$ | $4.2 \times 10^{-3}$ | higher mRNA abundance in glottis |
| PRB1      | 1.2                            | $5.7 \times 10^{-5}$ | $4.3 \times 10^{-3}$ | higher mRNA abundance in glottis |
| CST6      | 1.1                            | $5.8 \times 10^{-5}$ | $4.3 \times 10^{-3}$ | higher mRNA abundance in glottis |
| C10orf71  | 1.2                            | $6.3 \times 10^{-5}$ | $4.5 \times 10^{-3}$ | higher mRNA abundance in glottis |
| FRMPD2    | 1.2                            | $6.5 \times 10^{-5}$ | $4.6 \times 10^{-3}$ | higher mRNA abundance in glottis |
| TRHDE     | 1.2                            | $6.5 \times 10^{-5}$ | $4.6 \times 10^{-3}$ | higher mRNA abundance in glottis |
| GAS2L2    | 1.1                            | $6.7 \times 10^{-5}$ | $4.7 \times 10^{-3}$ | higher mRNA abundance in glottis |
| PZP       | 1.2                            | $6.8 \times 10^{-5}$ | $4.7 \times 10^{-3}$ | higher mRNA abundance in glottis |
| MYBPC2    | 1.2                            | $7.3 \times 10^{-5}$ | $5.0 \times 10^{-3}$ | higher mRNA abundance in glottis |
| SLC25A2   | 1.1                            | $7.8 \times 10^{-5}$ | $5.2 \times 10^{-3}$ | higher mRNA abundance in glottis |
| NME5      | 1.1                            | $7.8 \times 10^{-5}$ | $5.2 \times 10^{-3}$ | higher mRNA abundance in glottis |
| MORN5     | 1.2                            | $7.9 \times 10^{-5}$ | $5.2 \times 10^{-3}$ | higher mRNA abundance in glottis |
| ROS1      | 1.2                            | $8.2 \times 10^{-5}$ | $5.4 \times 10^{-3}$ | higher mRNA abundance in glottis |
| C6orf58   | 1.2                            | $8.4 \times 10^{-5}$ | $5.4 \times 10^{-3}$ | higher mRNA abundance in glottis |
| CR2       | 1.1                            | $8.6 \times 10^{-5}$ | $5.5 \times 10^{-3}$ | higher mRNA abundance in glottis |
| CHRNA1    | 1.2                            | $8.6 \times 10^{-5}$ | $5.6 \times 10^{-3}$ | higher mRNA abundance in glottis |
| ANKRD1    | 1.2                            | $8.7 \times 10^{-5}$ | $5.6 \times 10^{-3}$ | higher mRNA abundance in glottis |
| WDR65     | 1.0                            | $9.2 \times 10^{-5}$ | $5.8 \times 10^{-3}$ | higher mRNA abundance in glottis |
| Gene      | Log2 Fold Change or Odds Ratio | p Value              | FDR                  | Mutation Difference              |
| STAC3     | 1.0                            | $9.3 \times 10^{-5}$ | $5.8 \times 10^{-3}$ | higher mRNA abundance in glottis |
| TNNI1     | 1.1                            | $1.1 \times 10^{-4}$ | $6.6 \times 10^{-3}$ | higher mRNA abundance in glottis |

| MYLPF     | 1.2                            | $1.1 \times 10^{-4}$  | $6.8 \times 10^{-3}$  | higher mRNA abundance in glottis      |
|-----------|--------------------------------|-----------------------|-----------------------|---------------------------------------|
| SLPI      | 1.0                            | $1.2 \times 10^{-4}$  | $6.9 \times 10^{-3}$  | higher mRNA abundance in glottis      |
| C14orf34  | 1.0                            | $1.2 \times 10^{-4}$  | $7.0 \times 10^{-3}$  | higher mRNA abundance in glottis      |
| PRKAG3    | 1.2                            | $1.2 \times 10^{-4}$  | $7.0 \times 10^{-3}$  | higher mRNA abundance in glottis      |
| C13orf30  | 1.1                            | $1.3 \times 10^{-4}$  | $7.6 \times 10^{-3}$  | higher mRNA abundance in glottis      |
| CACNG6    | 1.1                            | $1.6 \times 10^{-4}$  | $8.6 \times 10^{-3}$  | higher mRNA abundance in glottis      |
| CACNG1    | 1.1                            | $1.6 \times 10^{-4}$  | $8.7 \times 10^{-3}$  | higher mRNA abundance in glottis      |
| ACTC1     | 1.1                            | $1.8 \times 10^{-4}$  | $9.1 \times 10^{-3}$  | higher mRNA abundance in glottis      |
| DCDC2B    | 1.1                            | $1.8 \times 10^{-4}$  | $9.3 \times 10^{-3}$  | higher mRNA abundance in glottis      |
| SPATA4    | 1.1                            | $1.9 \times 10^{-4}$  | $9.3 \times 10^{-3}$  | higher mRNA abundance in glottis      |
| NCAM1     | 1.0                            | $1.9 \times 10^{-4}$  | $9.3 \times 10^{-3}$  | higher mRNA abundance in glottis      |
| ARL14     | 1.1                            | $2.0 \times 10^{-4}$  | $9.8 \times 10^{-3}$  | higher mRNA abundance in glottis      |
| BEST3     | 1.1                            | $2.0 \times 10^{-4}$  | $9.9 \times 10^{-3}$  | higher mRNA abundance in glottis      |
| KLHDC8A   | -2.2                           | $3.4 \times 10^{-14}$ | $6.3 \times 10^{-10}$ | higher mRNA abundance in supraglottis |
| CHRM5     | -2.0                           | $8.4 \times 10^{-14}$ | $7.9 \times 10^{-10}$ | higher mRNA abundance in supraglottis |
| MUC6      | -2.0                           | $1.2 \times 10^{-12}$ | $7.2 \times 10^{-9}$  | higher mRNA abundance in supraglottis |
| HRASLS5   | -2.1                           | $1.7 \times 10^{-12}$ | $8.0 \times 10^{-9}$  | higher mRNA abundance in supraglottis |
| SLC4A8    | -1.9                           | $2.1 \times 10^{-12}$ | $8.0 \times 10^{-9}$  | higher mRNA abundance in supraglottis |
| SLC13A4   | -1.9                           | $3.8 \times 10^{-12}$ | $1.1 \times 10^{-8}$  | higher mRNA abundance in supraglottis |
| CALHM3    | -2.1                           | $5.7 \times 10^{-12}$ | $1.3 \times 10^{-8}$  | higher mRNA abundance in supraglottis |
| CYP11A1   | -1.9                           | $3.2 \times 10^{-11}$ | $6.7 \times 10^{-8}$  | higher mRNA abundance in supraglottis |
| PIPOX     | -1.6                           | $4.1 \times 10^{-11}$ | $7.7 \times 10^{-8}$  | higher mRNA abundance in supraglottis |
| CPA2      | -1.8                           | $6.9 \times 10^{-10}$ | $1.0 \times 10^{-6}$  | higher mRNA abundance in supraglottis |
| SVOP      | -1.8                           | $7.1 \times 10^{-10}$ | $1.0 \times 10^{-6}$  | higher mRNA abundance in supraglottis |
| CLCNKA    | -1.8                           | $9.8 \times 10^{-10}$ | $1.3 \times 10^{-6}$  | higher mRNA abundance in supraglottis |
| CTCFL     | -1.6                           | $1.4 \times 10^{-9}$  | $1.6 \times 10^{-6}$  | higher mRNA abundance in supraglottis |
| ARHGEF33  | -1.4                           | $2.2 \times 10^{-9}$  | $2.1 \times 10^{-6}$  | higher mRNA abundance in supraglottis |
| TMEM151B  | -1.6                           | $2.2 \times 10^{-9}$  | $2.1 \times 10^{-6}$  | higher mRNA abundance in supraglottis |
| VIL1      | -1.8                           | $2.3 \times 10^{-9}$  | $2.1 \times 10^{-6}$  | higher mRNA abundance in supraglottis |
| CDH12     | -1.7                           | $5.6 \times 10^{-9}$  | $5.0 \times 10^{-6}$  | higher mRNA abundance in supraglottis |
| KCNJ4     | -1.7                           | $6.2 \times 10^{-9}$  | $5.3 \times 10^{-6}$  | higher mRNA abundance in supraglottis |
| FTCD      | -1.7                           | $7.2 \times 10^{-9}$  | $5.6 \times 10^{-6}$  | higher mRNA abundance in supraglottis |
| PNMA5     | -1.7                           | $7.4 \times 10^{-9}$  | $5.6 \times 10^{-6}$  | higher mRNA abundance in supraglottis |
| URO1      | -1.7                           | $9.4 \times 10^{-9}$  | $6.6 \times 10^{-6}$  | higher mRNA abundance in supraglottis |
| THSD7B    | -1.7                           | $1.2 \times 10^{-8}$  | $7.8 \times 10^{-6}$  | higher mRNA abundance in supraglottis |
| Gene      | Log2 Fold Change or Odds Ratio | p Value               | FDR                   | Mutation Difference                   |
| TDRD12    | -1.7                           | $1.5 \times 10^{-8}$  | $9.6 \times 10^{-6}$  | higher mRNA abundance in supraglottis |
| CCDC152   | -1.3                           | $2.6 \times 10^{-8}$  | $1.5 \times 10^{-5}$  | higher mRNA abundance in supraglottis |
| LOC387646 | -1.3                           | $2.9 \times 10^{-8}$  | $1.6 \times 10^{-5}$  | higher mRNA abundance in supraglottis |
| SERPINI1  | -1.5                           | $3.2 \times 10^{-8}$  | $1.8 \times 10^{-5}$  | higher mRNA abundance in supraglottis |
| RCOR2     | -1.2                           | $3.4 \times 10^{-8}$  | $1.8 \times 10^{-5}$  | higher mRNA abundance in supraglottis |
| DCAF12L2  | -1.6                           | $3.4 \times 10^{-8}$  | $1.8 \times 10^{-5}$  | higher mRNA abundance in supraglottis |
| DLGAP1    | -1.6                           | $3.8 \times 10^{-8}$  | $1.9 \times 10^{-5}$  | higher mRNA abundance in supraglottis |
| TDRD1     | -1.6                           | $4.3 \times 10^{-8}$  | $2.1 \times 10^{-5}$  | higher mRNA abundance in supraglottis |
| LOC84856  | -1.4                           | $5.5 \times 10^{-8}$  | $2.5 \times 10^{-5}$  | higher mRNA abundance in supraglottis |
| WFIKKN2   | -1.6                           | $5.6 \times 10^{-8}$  | $2.5 \times 10^{-5}$  | higher mRNA abundance in supraglottis |
| NAP1L6    | -1.6                           | $5.7 \times 10^{-8}$  | $2.5 \times 10^{-5}$  | higher mRNA abundance in supraglottis |
| NEUROD2   | -1.6                           | $1.1 \times 10^{-7}$  | $4.4 \times 10^{-5}$  | higher mRNA abundance in supraglottis |
| NKX2      | -1.5                           | $1.1 \times 10^{-7}$  | $4.4 \times 10^{-5}$  | higher mRNA abundance in supraglottis |
| PENK      | -1.6                           | $1.2 \times 10^{-7}$  | $4.6 \times 10^{-5}$  | higher mRNA abundance in supraglottis |
| CYP26C1   | -1.6                           | $1.3 \times 10^{-7}$  | $4.7 \times 10^{-5}$  | higher mRNA abundance in supraglottis |
| ABCG5     | -1.5                           | $1.3 \times 10^{-7}$  | $4.7 \times 10^{-5}$  | higher mRNA abundance in supraglottis |
| TKTL1     | -1.6                           | $1.5 \times 10^{-7}$  | $5.3 \times 10^{-5}$  | higher mRNA abundance in supraglottis |
| CCDC136   | -1.2                           | $1.9 \times 10^{-7}$  | $6.4 \times 10^{-5}$  | higher mRNA abundance in supraglottis |



| ANO3      | -1.5                           | $1.9 \times 10^{-7}$ | $6.4 \times 10^{-5}$ | higher mRNA abundance in supraglottis |
|-----------|--------------------------------|----------------------|----------------------|---------------------------------------|
| MYB       | -1.3                           | $2.2 \times 10^{-7}$ | $7.2 \times 10^{-5}$ | higher mRNA abundance in supraglottis |
| PCSK2     | -1.5                           | $2.8 \times 10^{-7}$ | $8.7 \times 10^{-5}$ | higher mRNA abundance in supraglottis |
| C10orf105 | -1.4                           | $3.5 \times 10^{-7}$ | $1.0 \times 10^{-4}$ | higher mRNA abundance in supraglottis |
| FGF21     | -1.5                           | $3.7 \times 10^{-7}$ | $1.1 \times 10^{-4}$ | higher mRNA abundance in supraglottis |
| CTRB2     | -1.5                           | $3.8 \times 10^{-7}$ | $1.1 \times 10^{-4}$ | higher mRNA abundance in supraglottis |
| ZNF542    | -1.1                           | $4.8 \times 10^{-7}$ | $1.3 \times 10^{-4}$ | higher mRNA abundance in supraglottis |
| NGB       | -1.5                           | $5.3 \times 10^{-7}$ | $1.4 \times 10^{-4}$ | higher mRNA abundance in supraglottis |
| F2        | -1.5                           | $5.5 \times 10^{-7}$ | $1.4 \times 10^{-4}$ | higher mRNA abundance in supraglottis |
| GRIK4     | -1.4                           | $5.6 \times 10^{-7}$ | $1.4 \times 10^{-4}$ | higher mRNA abundance in supraglottis |
| C7orf58   | -1.2                           | $5.7 \times 10^{-7}$ | $1.4 \times 10^{-4}$ | higher mRNA abundance in supraglottis |
| TUBA3E    | -1.5                           | $5.7 \times 10^{-7}$ | $1.4 \times 10^{-4}$ | higher mRNA abundance in supraglottis |
| LMO3      | -1.3                           | $6.0 \times 10^{-7}$ | $1.5 \times 10^{-4}$ | higher mRNA abundance in supraglottis |
| HAPLN2    | -1.5                           | $6.3 \times 10^{-7}$ | $1.6 \times 10^{-4}$ | higher mRNA abundance in supraglottis |
| FGFBP2    | -1.5                           | $9.3 \times 10^{-7}$ | $2.2 \times 10^{-4}$ | higher mRNA abundance in supraglottis |
| CABP1     | -1.1                           | $9.8 \times 10^{-7}$ | $2.3 \times 10^{-4}$ | higher mRNA abundance in supraglottis |
| LCT       | -1.4                           | $1.3 \times 10^{-6}$ | $3.0 \times 10^{-4}$ | higher mRNA abundance in supraglottis |
| KRT71     | -1.4                           | $1.4 \times 10^{-6}$ | $3.0 \times 10^{-4}$ | higher mRNA abundance in supraglottis |
| KRT20     | -1.5                           | $1.4 \times 10^{-6}$ | $3.0 \times 10^{-4}$ | higher mRNA abundance in supraglottis |
| Gene      | Log2 Fold Change or Odds Ratio | p Value              | FDR                  | Mutation Difference                   |
| LOC283999 | -1.5                           | $1.5 \times 10^{-6}$ | $3.0 \times 10^{-4}$ | higher mRNA abundance in supraglottis |
| CABP7     | -1.2                           | $1.5 \times 10^{-6}$ | $3.0 \times 10^{-4}$ | higher mRNA abundance in supraglottis |
| PON3      | -1.4                           | $1.5 \times 10^{-6}$ | $3.0 \times 10^{-4}$ | higher mRNA abundance in supraglottis |
| GPR83     | -1.2                           | $1.9 \times 10^{-6}$ | $3.8 \times 10^{-4}$ | higher mRNA abundance in supraglottis |
| CPA1      | -1.4                           | $2.0 \times 10^{-6}$ | $4.0 \times 10^{-4}$ | higher mRNA abundance in supraglottis |
| ABCG8     | -1.4                           | $2.2 \times 10^{-6}$ | $4.1 \times 10^{-4}$ | higher mRNA abundance in supraglottis |
| LY6G6F    | -1.4                           | $2.4 \times 10^{-6}$ | $4.4 \times 10^{-4}$ | higher mRNA abundance in supraglottis |
| SRMS      | -1.3                           | $2.5 \times 10^{-6}$ | $4.5 \times 10^{-4}$ | higher mRNA abundance in supraglottis |
| IQCG      | -1.1                           | $3.4 \times 10^{-6}$ | $5.8 \times 10^{-4}$ | higher mRNA abundance in supraglottis |
| KCNN1     | -1.2                           | $3.9 \times 10^{-6}$ | $6.6 \times 10^{-4}$ | higher mRNA abundance in supraglottis |
| PLCH1     | -1.2                           | $4.2 \times 10^{-6}$ | $6.8 \times 10^{-4}$ | higher mRNA abundance in supraglottis |
| TMPRSS15  | -1.4                           | $4.3 \times 10^{-6}$ | $6.8 \times 10^{-4}$ | higher mRNA abundance in supraglottis |
| psiTPTE22 | -1.3                           | $4.3 \times 10^{-6}$ | $6.8 \times 10^{-4}$ | higher mRNA abundance in supraglottis |
| TRPM5     | -1.3                           | $4.8 \times 10^{-6}$ | $7.4 \times 10^{-4}$ | higher mRNA abundance in supraglottis |
| OR1F1     | -1.3                           | $4.9 \times 10^{-6}$ | $7.5 \times 10^{-4}$ | higher mRNA abundance in supraglottis |
| TUBAL3    | -1.1                           | $5.0 \times 10^{-6}$ | $7.6 \times 10^{-4}$ | higher mRNA abundance in supraglottis |
| OLFM4     | -1.4                           | $5.0 \times 10^{-6}$ | $7.6 \times 10^{-4}$ | higher mRNA abundance in supraglottis |
| PCSK4     | -1.1                           | $5.2 \times 10^{-6}$ | $7.7 \times 10^{-4}$ | higher mRNA abundance in supraglottis |
| SYN2      | -1.3                           | $6.0 \times 10^{-6}$ | $8.6 \times 10^{-4}$ | higher mRNA abundance in supraglottis |
| BSND      | -1.3                           | $6.1 \times 10^{-6}$ | $8.7 \times 10^{-4}$ | higher mRNA abundance in supraglottis |
| DEPDC6    | -1.1                           | $6.2 \times 10^{-6}$ | $8.8 \times 10^{-4}$ | higher mRNA abundance in supraglottis |
| SLC30A8   | -1.4                           | $6.4 \times 10^{-6}$ | $9.0 \times 10^{-4}$ | higher mRNA abundance in supraglottis |
| REEP2     | -1.0                           | $6.5 \times 10^{-6}$ | $9.1 \times 10^{-4}$ | higher mRNA abundance in supraglottis |
| LOC284578 | -1.3                           | $7.0 \times 10^{-6}$ | $9.6 \times 10^{-4}$ | higher mRNA abundance in supraglottis |
| WNT10B    | -1.0                           | $8.6 \times 10^{-6}$ | $1.1 \times 10^{-3}$ | higher mRNA abundance in supraglottis |
| GCK       | -1.1                           | $9.4 \times 10^{-6}$ | $1.2 \times 10^{-3}$ | higher mRNA abundance in supraglottis |
| LIN28B    | -1.3                           | $1.0 \times 10^{-5}$ | $1.2 \times 10^{-3}$ | higher mRNA abundance in supraglottis |
| INHBE     | -1.1                           | $1.2 \times 10^{-5}$ | $1.4 \times 10^{-3}$ | higher mRNA abundance in supraglottis |
| SHH       | -1.3                           | $1.3 \times 10^{-5}$ | $1.5 \times 10^{-3}$ | higher mRNA abundance in supraglottis |
| ADCY8     | -1.2                           | $1.5 \times 10^{-5}$ | $1.7 \times 10^{-3}$ | higher mRNA abundance in supraglottis |
| SLC1A2    | -1.2                           | $1.7 \times 10^{-5}$ | $1.9 \times 10^{-3}$ | higher mRNA abundance in supraglottis |
| C15orf55  | -1.3                           | $1.7 \times 10^{-5}$ | $1.9 \times 10^{-3}$ | higher mRNA abundance in supraglottis |
| WNT8B     | -1.2                           | $1.8 \times 10^{-5}$ | $1.9 \times 10^{-3}$ | higher mRNA abundance in supraglottis |
| ZNF883    | -1.2                           | $1.9 \times 10^{-5}$ | $2.0 \times 10^{-3}$ | higher mRNA abundance in supraglottis |

| WNT16      | -1.2                           | $2.0 \times 10^{-5}$ | $2.1 \times 10^{-3}$ | higher mRNA abundance in supraglottis |
|------------|--------------------------------|----------------------|----------------------|---------------------------------------|
| MT3        | -1.3                           | $2.1 \times 10^{-5}$ | $2.2 \times 10^{-3}$ | higher mRNA abundance in supraglottis |
| FA2H       | -1.1                           | $2.3 \times 10^{-5}$ | $2.3 \times 10^{-3}$ | higher mRNA abundance in supraglottis |
| Gene       | Log2 Fold Change or Odds Ratio | p Value              | FDR                  | Mutation Difference                   |
| ANKRD34B   | -1.2                           | $2.3 \times 10^{-5}$ | $2.3 \times 10^{-3}$ | higher mRNA abundance in supraglottis |
| SLC8A2     | -1.1                           | $2.5 \times 10^{-5}$ | $2.4 \times 10^{-3}$ | higher mRNA abundance in supraglottis |
| LIM2       | -1.3                           | $2.6 \times 10^{-5}$ | $2.5 \times 10^{-3}$ | higher mRNA abundance in supraglottis |
| MUC17      | -1.3                           | $2.7 \times 10^{-5}$ | $2.5 \times 10^{-3}$ | higher mRNA abundance in supraglottis |
| ZYG11A     | -1.2                           | $2.7 \times 10^{-5}$ | $2.6 \times 10^{-3}$ | higher mRNA abundance in supraglottis |
| RPS2P32    | -1.0                           | $2.9 \times 10^{-5}$ | $2.7 \times 10^{-3}$ | higher mRNA abundance in supraglottis |
| DBX2       | -1.2                           | $3.1 \times 10^{-5}$ | $2.8 \times 10^{-3}$ | higher mRNA abundance in supraglottis |
| TMEM35     | -1.1                           | $3.2 \times 10^{-5}$ | $2.8 \times 10^{-3}$ | higher mRNA abundance in supraglottis |
| ZNF280B    | -1.1                           | $3.2 \times 10^{-5}$ | $2.9 \times 10^{-3}$ | higher mRNA abundance in supraglottis |
| CPSF4L     | -1.2                           | $3.3 \times 10^{-5}$ | $2.9 \times 10^{-3}$ | higher mRNA abundance in supraglottis |
| FBXL13     | -1.1                           | $3.4 \times 10^{-5}$ | $2.9 \times 10^{-3}$ | higher mRNA abundance in supraglottis |
| TULP2      | -1.2                           | $3.5 \times 10^{-5}$ | $3.0 \times 10^{-3}$ | higher mRNA abundance in supraglottis |
| TSPYL5     | -1.1                           | $3.6 \times 10^{-5}$ | $3.1 \times 10^{-3}$ | higher mRNA abundance in supraglottis |
| POU4F1     | -1.2                           | $3.7 \times 10^{-5}$ | $3.2 \times 10^{-3}$ | higher mRNA abundance in supraglottis |
| GPAT2      | -1.1                           | $3.8 \times 10^{-5}$ | $3.2 \times 10^{-3}$ | higher mRNA abundance in supraglottis |
| DNAJC22    | -1.0                           | $4.0 \times 10^{-5}$ | $3.3 \times 10^{-3}$ | higher mRNA abundance in supraglottis |
| MLC1       | -1.0                           | $4.0 \times 10^{-5}$ | $3.3 \times 10^{-3}$ | higher mRNA abundance in supraglottis |
| NCRNA00202 | -1.2                           | $4.2 \times 10^{-5}$ | $3.4 \times 10^{-3}$ | higher mRNA abundance in supraglottis |
| MYH7B      | -1.1                           | $4.2 \times 10^{-5}$ | $3.4 \times 10^{-3}$ | higher mRNA abundance in supraglottis |
| MOXD1      | -1.1                           | $4.2 \times 10^{-5}$ | $3.4 \times 10^{-3}$ | higher mRNA abundance in supraglottis |
| C6orf221   | -1.2                           | $4.3 \times 10^{-5}$ | $3.5 \times 10^{-3}$ | higher mRNA abundance in supraglottis |
| DPP4       | -1.1                           | $4.5 \times 10^{-5}$ | $3.6 \times 10^{-3}$ | higher mRNA abundance in supraglottis |
| C2orf65    | -1.2                           | $4.6 \times 10^{-5}$ | $3.6 \times 10^{-3}$ | higher mRNA abundance in supraglottis |
| COL21A1    | -1.2                           | $4.8 \times 10^{-5}$ | $3.8 \times 10^{-3}$ | higher mRNA abundance in supraglottis |
| GIP        | -1.2                           | $5.0 \times 10^{-5}$ | $3.8 \times 10^{-3}$ | higher mRNA abundance in supraglottis |
| BEST2      | -1.2                           | $5.8 \times 10^{-5}$ | $4.3 \times 10^{-3}$ | higher mRNA abundance in supraglottis |
| HPN        | -1.2                           | $5.8 \times 10^{-5}$ | $4.3 \times 10^{-3}$ | higher mRNA abundance in supraglottis |
| ZIC4       | -1.2                           | $5.9 \times 10^{-5}$ | $4.3 \times 10^{-3}$ | higher mRNA abundance in supraglottis |
| TCEB3B     | -1.2                           | $6.1 \times 10^{-5}$ | $4.4 \times 10^{-3}$ | higher mRNA abundance in supraglottis |
| GRB14      | -1.1                           | $6.4 \times 10^{-5}$ | $4.6 \times 10^{-3}$ | higher mRNA abundance in supraglottis |
| PLSCR2     | -1.1                           | $6.7 \times 10^{-5}$ | $4.7 \times 10^{-3}$ | higher mRNA abundance in supraglottis |
| PCP4       | -1.1                           | $6.9 \times 10^{-5}$ | $4.8 \times 10^{-3}$ | higher mRNA abundance in supraglottis |
| HBE1       | -1.1                           | $7.0 \times 10^{-5}$ | $4.8 \times 10^{-3}$ | higher mRNA abundance in supraglottis |
| CDH18      | -1.2                           | $7.4 \times 10^{-5}$ | $5.1 \times 10^{-3}$ | higher mRNA abundance in supraglottis |
| FGF12      | -1.0                           | $7.5 \times 10^{-5}$ | $5.1 \times 10^{-3}$ | higher mRNA abundance in supraglottis |
| HHLA2      | -1.1                           | $7.7 \times 10^{-5}$ | $5.2 \times 10^{-3}$ | higher mRNA abundance in supraglottis |
| C8orf85    | -1.1                           | $7.7 \times 10^{-5}$ | $5.2 \times 10^{-3}$ | higher mRNA abundance in supraglottis |
| Gene       | Log2 Fold Change or Odds Ratio | p Value              | FDR                  | Mutation Difference                   |
| DLEC1      | -1.2                           | $8.7 \times 10^{-5}$ | $5.6 \times 10^{-3}$ | higher mRNA abundance in supraglottis |
| SGK2       | -1.1                           | $8.8 \times 10^{-5}$ | $5.6 \times 10^{-3}$ | higher mRNA abundance in supraglottis |
| ALX4       | -1.2                           | $9.3 \times 10^{-5}$ | $5.8 \times 10^{-3}$ | higher mRNA abundance in supraglottis |
| USH1C      | -1.2                           | $1.0 \times 10^{-4}$ | $6.1 \times 10^{-3}$ | higher mRNA abundance in supraglottis |
| TUBA3C     | -1.2                           | $1.1 \times 10^{-4}$ | $6.6 \times 10^{-3}$ | higher mRNA abundance in supraglottis |
| C17orf93   | -1.2                           | $1.1 \times 10^{-4}$ | $6.9 \times 10^{-3}$ | higher mRNA abundance in supraglottis |
| CCL26      | -1.0                           | $1.2 \times 10^{-4}$ | $6.9 \times 10^{-3}$ | higher mRNA abundance in supraglottis |
| OTX2       | -1.1                           | $1.2 \times 10^{-4}$ | $7.0 \times 10^{-3}$ | higher mRNA abundance in supraglottis |
| STOX1      | -1.0                           | $1.2 \times 10^{-4}$ | $7.0 \times 10^{-3}$ | higher mRNA abundance in supraglottis |
| OTOF       | -1.1                           | $1.3 \times 10^{-4}$ | $7.2 \times 10^{-3}$ | higher mRNA abundance in supraglottis |
| LOC401387  | -1.1                           | $1.3 \times 10^{-4}$ | $7.6 \times 10^{-3}$ | higher mRNA abundance in supraglottis |
| ZNF541     | -1.1                           | $1.3 \times 10^{-4}$ | $7.6 \times 10^{-3}$ | higher mRNA abundance in supraglottis |

|             |                                       |                      |                      |                                       |
|-------------|---------------------------------------|----------------------|----------------------|---------------------------------------|
| AIPL1       | -1.1                                  | $1.3 \times 10^{-4}$ | $7.6 \times 10^{-3}$ | higher mRNA abundance in supraglottis |
| BHMT        | -1.1                                  | $1.4 \times 10^{-4}$ | $7.7 \times 10^{-3}$ | higher mRNA abundance in supraglottis |
| STRA8       | -1.1                                  | $1.4 \times 10^{-4}$ | $7.7 \times 10^{-3}$ | higher mRNA abundance in supraglottis |
| TMEM84      | -1.1                                  | $1.4 \times 10^{-4}$ | $7.8 \times 10^{-3}$ | higher mRNA abundance in supraglottis |
| RHBDL3      | -1.0                                  | $1.5 \times 10^{-4}$ | $8.0 \times 10^{-3}$ | higher mRNA abundance in supraglottis |
| B3GALT2     | -1.0                                  | $1.5 \times 10^{-4}$ | $8.0 \times 10^{-3}$ | higher mRNA abundance in supraglottis |
| MAB21L1     | -1.0                                  | $1.5 \times 10^{-4}$ | $8.2 \times 10^{-3}$ | higher mRNA abundance in supraglottis |
| FGA         | -1.1                                  | $1.5 \times 10^{-4}$ | $8.3 \times 10^{-3}$ | higher mRNA abundance in supraglottis |
| NPPC        | -1.1                                  | $1.6 \times 10^{-4}$ | $8.6 \times 10^{-3}$ | higher mRNA abundance in supraglottis |
| B3GALT1     | -1.1                                  | $1.7 \times 10^{-4}$ | $8.8 \times 10^{-3}$ | higher mRNA abundance in supraglottis |
| C11orf86    | -1.1                                  | $1.7 \times 10^{-4}$ | $8.9 \times 10^{-3}$ | higher mRNA abundance in supraglottis |
| ZIC1        | -1.1                                  | $1.8 \times 10^{-4}$ | $9.1 \times 10^{-3}$ | higher mRNA abundance in supraglottis |
| PRSS50      | -1.1                                  | $1.8 \times 10^{-4}$ | $9.1 \times 10^{-3}$ | higher mRNA abundance in supraglottis |
| SIGLEC16    | -1.0                                  | $2.0 \times 10^{-4}$ | $9.7 \times 10^{-3}$ | higher mRNA abundance in supraglottis |
| HKDC1       | -1.0                                  | $2.0 \times 10^{-4}$ | $9.8 \times 10^{-3}$ | higher mRNA abundance in supraglottis |
| NSD1        | $2.5 \times 10^{-4}$                  | $2.5 \times 10^{-4}$ | $7.6 \times 10^{-2}$ | more SNV mutations in supraglottis    |
| COL11A1     | $3.8 \times 10^{-4}$                  | $3.8 \times 10^{-4}$ | $7.6 \times 10^{-2}$ | more SNV mutations in supraglottis    |
| CTNNA2      | $1.1 \times 10^{-3}$                  | $1.1 \times 10^{-3}$ | $7.6 \times 10^{-2}$ | more SNV mutations in supraglottis    |
| ERICH3      | $1.1 \times 10^{-3}$                  | $1.1 \times 10^{-3}$ | $7.6 \times 10^{-2}$ | more SNV mutations in supraglottis    |
| FAM47C      | $1.1 \times 10^{-3}$                  | $1.1 \times 10^{-3}$ | $7.6 \times 10^{-2}$ | more SNV mutations in supraglottis    |
| PKHD1L1     | $1.1 \times 10^{-3}$                  | $1.1 \times 10^{-3}$ | $7.6 \times 10^{-2}$ | more SNV mutations in supraglottis    |
| LAMA2       | $1.5 \times 10^{-3}$                  | $1.5 \times 10^{-3}$ | $8.5 \times 10^{-2}$ | more SNV mutations in supraglottis    |
| COL22A1     | $1.7 \times 10^{-3}$                  | $1.7 \times 10^{-3}$ | $8.5 \times 10^{-2}$ | more SNV mutations in supraglottis    |
| ADCY2       | $2.5 \times 10^{-3}$                  | $2.5 \times 10^{-3}$ | $9.6 \times 10^{-2}$ | more SNV mutations in supraglottis    |
| DCC         | $2.5 \times 10^{-3}$                  | $2.5 \times 10^{-3}$ | $9.6 \times 10^{-2}$ | more SNV mutations in supraglottis    |
| <b>Gene</b> | <b>Log2 Fold Change or Odds Ratio</b> | <b>p Value</b>       | <b>FDR</b>           | <b>Mutation Difference</b>            |
| MUC16       | $2.9 \times 10^{-3}$                  | $2.9 \times 10^{-3}$ | $9.6 \times 10^{-2}$ | more SNV mutations in supraglottis    |
| SI          | $3.3 \times 10^{-3}$                  | $3.3 \times 10^{-3}$ | $9.6 \times 10^{-2}$ | more SNV mutations in supraglottis    |
| NPAP1       | $3.6 \times 10^{-3}$                  | $3.6 \times 10^{-3}$ | $9.6 \times 10^{-2}$ | more SNV mutations in supraglottis    |
| LAMA1       | $3.6 \times 10^{-3}$                  | $3.6 \times 10^{-3}$ | $9.6 \times 10^{-2}$ | more SNV mutations in supraglottis    |
| PCDH15      | $3.6 \times 10^{-3}$                  | $3.6 \times 10^{-3}$ | $9.6 \times 10^{-2}$ | more SNV mutations in supraglottis    |

**Table S3.** Pathway over-representations from genes with differential frequencies of SNVs and CNAs correlated with mRNAs between glottic and supraglottic LSCC. Blue indicates genes with higher mRNA abundance and copy number in the supraglottis, whereas red indicates genes with higher mRNA abundance and copy number in the glottis. The uncolored genes represent those with differences in SNV.

| Pathway Identifier             | R-HSA-397014                                               |                          |                                                                                                                     |
|--------------------------------|------------------------------------------------------------|--------------------------|---------------------------------------------------------------------------------------------------------------------|
| Description                    | #Entities total: 209 Muscle contraction                    |                          |                                                                                                                     |
| 1 #Entities mapped in Reactome | 17                                                         | Submitted entities found | ACTC1, ATP1A2, CACNG1, CACNG6, CASQ2, FGF12, KCNJ4, MYBPC2, MYH3, MYL4, MYLPF, NPPC, SLC8A2, SLN, TNNC2, TNNI1, TTN |
| <i>p</i> -value                | $1.31 \times 10^{-9}$                                      | FDR <i>q</i> -value      | $3.71 \times 10^{-7}$                                                                                               |
| Pathway identifier             | R-HSA-390522                                               |                          |                                                                                                                     |
| Description                    | #Entities total: 36 Striated Muscle Contraction            |                          |                                                                                                                     |
| 2 #Entities mapped in Reactome | 7                                                          | Submitted entities found | ACTC1, MYBPC2, MYH3, MYL4, TNNC2, TNNI1, TTN                                                                        |
| <i>p</i> -value                | $3.05 \times 10^{-7}$                                      | FDR <i>q</i> -value      | $4.33 \times 10^{-5}$                                                                                               |
| Pathway identifier             | R-HSA-6809371                                              |                          |                                                                                                                     |
| Description                    | #Entities total: 129 Formation of the cornified envelope   |                          |                                                                                                                     |
| 3 #Entities mapped in Reactome | 11                                                         | Submitted entities found | KRT10, KRT2, KRT20, KRT34, LOC100653049, KRT37, KRT71, KRT84, LCE3D, LCE3E, SPRR2G                                  |
| <i>p</i> -value                | $7.77 \times 10^{-7}$                                      | FDR <i>q</i> -value      | $7.36 \times 10^{-5}$                                                                                               |
| Pathway identifier             | R-HSA-2672351                                              |                          |                                                                                                                     |
| Description                    | #Entities total: 109 Stimuli-sensing channels              |                          |                                                                                                                     |
| 4 #Entities mapped in Reactome | 8                                                          | Submitted entities found | ANO3, BEST2, BEST3, BSND, CASQ2, CLCNKA, SGK2, TRPM5                                                                |
| <i>p</i> -value                | $7.77 \times 10^{-5}$                                      | FDR <i>q</i> -value      | 0.00455                                                                                                             |
| Pathway identifier             | R-HSA-5576891                                              |                          |                                                                                                                     |
| Description                    | #Entities total: 141 Cardiac conduction                    |                          |                                                                                                                     |
| 5 #Entities mapped in Reactome | 9                                                          | Submitted entities found | ATP1A2, CACNG1, CACNG6, CASQ2, FGF12, KCNJ4, NPPC, SLC8A2, SLN                                                      |
| <i>p</i> -value                | $8.23 \times 10^{-5}$                                      | FDR <i>q</i> -value      | 0.00455                                                                                                             |
| Pathway identifier             | R-HSA-6805567                                              |                          |                                                                                                                     |
| Description                    | #Entities total: 214 Keratinization                        |                          |                                                                                                                     |
| 6 #Entities mapped in Reactome | 11                                                         | Submitted entities found | KRT10, KRT2, KRT20, KRT34, LOC100653049, KRT37, KRT71, KRT84, LCE3D, LCE3E, SPRR2G                                  |
| <i>p</i> -value                | $9.6 \times 10^{-5}$                                       | FDR <i>q</i> -value      | 0.00455                                                                                                             |
| Pathway identifier             | R-HSA-983712                                               |                          |                                                                                                                     |
| Description                    | #Entities total: 186 Ion channel transport                 |                          |                                                                                                                     |
| 7 #Entities mapped in Reactome | 10                                                         | Submitted entities found | ANO3, ATP1A2, BEST2, BEST3, BSND, CASQ2, CLCNKA, SGK2, SLN, TRPM5                                                   |
| <i>p</i> -value                | 0.000139                                                   | FDR <i>q</i> -value      | 0.00565                                                                                                             |
| Pathway identifier             | R-HSA-112315                                               |                          |                                                                                                                     |
| Description                    | #Entities total: 272 Transmission across Chemical Synapses |                          |                                                                                                                     |
| 8 #Entities mapped in Reactome | 12                                                         | Submitted entities found | ADCY2, ADCY8, CHRNA1, CHRNG, GRIK4, KCNJ4, PRKAG3, SLC1A2, SYN2, TUBA3C, TUBA3E, TUBAL3                             |
| <i>p</i> -value                | 0.000196                                                   | FDR <i>q</i> -value      | 0.00697                                                                                                             |

|    |                              |          |                          |                                                                                                        |
|----|------------------------------|----------|--------------------------|--------------------------------------------------------------------------------------------------------|
|    | Pathway identifier           |          |                          | R-HSA-112314                                                                                           |
|    | Description                  |          |                          | #Entities total: 206 Neurotransmitter receptors and postsynaptic signal transmission                   |
| 9  | #Entities mapped in Reactome | 10       | Submitted entities found | ADCY2, ADCY8, CHRNA1, CHRNG, GRIK4, KCNJ4, PRKAG3, TUBA3C, TUBA3E, TUBAL3                              |
|    | <i>p</i> -value              | 0.000319 | FDR <i>q</i> -value      | 0.0101                                                                                                 |
|    | Pathway identifier           |          |                          | R-HSA-9619483                                                                                          |
|    | Description                  |          |                          | #Entities total: 29 Activation of AMPK downstream of NMDARs                                            |
| 10 | #Entities mapped in Reactome | 4        | Submitted entities found | PRKAG3, TUBA3C, TUBA3E, TUBAL3                                                                         |
|    | <i>p</i> -value              | 0.000484 | FDR <i>q</i> -value      | 0.0138                                                                                                 |
|    | Pathway identifier           |          |                          | R-HSA-418990                                                                                           |
|    | Description                  |          |                          | #Entities total: 33 Adherens junctions interactions                                                    |
| 11 | #Entities mapped in Reactome | 4        | Submitted entities found | CADM3, CDH12, CDH15, CDH18                                                                             |
|    | <i>p</i> -value              | 0.000802 | FDR <i>q</i> -value      | 0.0202                                                                                                 |
|    | Pathway identifier           |          |                          | R-HSA-112316                                                                                           |
|    | Description                  |          |                          | #Entities total: 413 Neuronal System                                                                   |
| 12 | #Entities mapped in Reactome | 14       | Submitted entities found | ADCY2, ADCY8, CHRNA1, CHRNG, DLGAP1, GRIK4, KCNJ4, KCNN1, PRKAG3, SLC1A2, SYN2, TUBA3C, TUBA3E, TUBAL3 |
|    | <i>p</i> -value              | 0.000851 | FDR <i>q</i> -value      | 0.0202                                                                                                 |
|    | Pathway identifier           |          |                          | R-HSA-2980736                                                                                          |
|    | Description                  |          |                          | #Entities total: 90 Peptide hormone metabolism                                                         |
| 13 | #Entities mapped in Reactome | 6        | Submitted entities found | ADCY2, ADCY8, CHRNA1, CHRNG, DLGAP1, GRIK4, KCNJ4, KCNN1, PRKAG3, SLC1A2, SYN2, TUBA3C, TUBA3E, TUBAL3 |
|    | <i>p</i> -value              | 0.00104  | FDR <i>q</i> -value      | 0.0228                                                                                                 |
|    | Pathway identifier           |          |                          | R-HSA-5083625                                                                                          |
|    | Description                  |          |                          | #Entities total: 17N Defective GALNT3 causes familial hyperphosphatemic tumoral calcinosis (HFTC)      |
| 14 | #Entities mapped in Reactome | 3        | Submitted entities found | MUC16, MUC17, MUC6                                                                                     |
|    | <i>p</i> -value              | 0.00124  | FDR <i>q</i> -value      | 0.0233                                                                                                 |
|    | Pathway identifier           |          |                          | R-HSA-5083636                                                                                          |
|    | Description                  |          |                          | #Entities total: 17 Defective GALNT12 causes colorectal cancer 1 (CRCS1)                               |
| 15 | #Entities mapped in Reactome | 3        | Submitted entities found | MUC16, MUC17, MUC6                                                                                     |
|    | <i>p</i> -value              | 0.00124  | FDR <i>q</i> -value      | 0.0233                                                                                                 |
|    | Pathway identifier           |          |                          | R-HSA-373080                                                                                           |
|    | Description                  |          |                          | #Entities total: 95 Class B/2 (Secretin family receptors)                                              |
| 16 | #Entities mapped in Reactome | 6        | Submitted entities found | GIP, PTH1R, SHH, WNT10B, WNT16, WNT8B                                                                  |
|    | <i>p</i> -value              | 0.00138  | FDR <i>q</i> -value      | 0.0233                                                                                                 |
|    | Pathway identifier           |          |                          | R-HSA-190840                                                                                           |
| 17 | Description                  |          |                          | #Entities total: 18 Microtubule-dependent trafficking of connexons from Golgi to the plasma membrane   |

|    |                              |                                                                                     |                          |                                       |
|----|------------------------------|-------------------------------------------------------------------------------------|--------------------------|---------------------------------------|
|    | #Entities mapped in Reactome | 3                                                                                   | Submitted entities found | TUBA3C, TUBA3E, TUBAL3                |
|    | <i>p</i> -value              | 0.00147                                                                             | FDR <i>q</i> -value      | 0.0233                                |
|    | Pathway identifier           | R-HSA-5083632                                                                       |                          |                                       |
|    | Description                  | #Entities total: 18 Defective C1GALT1C1 causes Tn polyagglutination syndrome (TNPS) |                          |                                       |
| 18 | #Entities mapped in Reactome | 3                                                                                   | Submitted entities found | MUC16, MUC17, MUC6                    |
|    | <i>p</i> -value              | 0.00147                                                                             | FDR <i>q</i> -value      | 0.0233                                |
|    | Pathway identifier           | R-HSA-190872                                                                        |                          |                                       |
|    | Description                  | #Entities total: 19 Transport of connexons to the plasma membrane                   |                          |                                       |
| 19 | #Entities mapped in Reactome | 3                                                                                   | Submitted entities found | TUBA3C, TUBA3E, TUBAL3                |
|    | <i>p</i> -value              | 0.00173                                                                             | FDR <i>q</i> -value      | 0.0259                                |
|    | Pathway identifier           | R-HSA-389977                                                                        |                          |                                       |
|    | Description                  | #Entities total: 22 Post-chaperonin tubulin folding pathway                         |                          |                                       |
| 20 | #Entities mapped in Reactome | 3                                                                                   | Submitted entities found | TUBA3C, TUBA3E, TUBAL3                |
|    | <i>p</i> -value              | 0.00268                                                                             | FDR <i>q</i> -value      | 0.0381                                |
|    | Pathway identifier           | R-HSA-977068                                                                        |                          |                                       |
|    | Description                  | #Entities total: 24 Termination of O-glycan biosynthesis                            |                          |                                       |
| 21 | #Entities mapped in Reactome | 3                                                                                   | Submitted entities found | MUC16, MUC17, MUC6                    |
|    | <i>p</i> -value              | 0.00345                                                                             | FDR <i>q</i> -value      | 0.0468                                |
|    | Pathway identifier           | R-HSA-438064                                                                        |                          |                                       |
|    | Description                  | #Entities total: 81 Post NMDA receptor activation events                            |                          |                                       |
| 22 | #Entities mapped in Reactome | 5                                                                                   | Submitted entities found | ADCY8, PRKAG3, TUBA3C, TUBA3E, TUBAL3 |
|    | <i>p</i> -value              | 0.00383                                                                             | FDR <i>q</i> -value      | 0.0481                                |
|    | Pathway identifier           | R-HSA-389960                                                                        |                          |                                       |
|    | Description                  | #Entities total: 25 Formation of tubulin folding intermediates by CCT/TriC          |                          |                                       |
| 23 | #Entities mapped in Reactome | 3                                                                                   | Submitted entities found | TUBA3C, TUBA3E, TUBAL3                |
|    | <i>p</i> -value              | 0.00389                                                                             | FDR <i>q</i> -value      | 0.0481                                |

**Table S4.** RPPA differences between supraglottic and glottic LSCC. All results with *p* Value <0.05 are shown.

| <b>Protein/Phosphoprotein</b> | <b><i>p</i> Value</b> | <b>FDR</b>           | <b>Higher Protein Abundance in?</b> |
|-------------------------------|-----------------------|----------------------|-------------------------------------|
| MIG6                          | $2.6 \times 10^{-4}$  | $4.4 \times 10^{-2}$ | Glottis                             |
| PREX1                         | $3.7 \times 10^{-4}$  | $4.4 \times 10^{-2}$ | Glottis                             |
| IRS1                          | $1.1 \times 10^{-3}$  | $7.3 \times 10^{-2}$ | Glottis                             |
| ETS1                          | $1.3 \times 10^{-3}$  | $7.3 \times 10^{-2}$ | Glottis                             |
| CHK1_pS296                    | $1.5 \times 10^{-3}$  | $7.3 \times 10^{-2}$ | Glottis                             |
| CKIT                          | $5.9 \times 10^{-3}$  | $1.4 \times 10^{-1}$ | Glottis                             |
| ECADHERIN                     | $6.4 \times 10^{-3}$  | $1.4 \times 10^{-1}$ | Supraglottis                        |
| HER3_pY1289                   | $4.5 \times 10^{-3}$  | $1.4 \times 10^{-1}$ | Glottis                             |
| HSP70                         | $5.9 \times 10^{-3}$  | $1.4 \times 10^{-1}$ | Glottis                             |
| PEA15_pS116                   | $5.9 \times 10^{-3}$  | $1.4 \times 10^{-1}$ | Glottis                             |
| TRANSGLUTAMINASE              | $7.0 \times 10^{-3}$  | $1.4 \times 10^{-1}$ | Glottis                             |
| X1433BETA                     | $5.4 \times 10^{-3}$  | $1.4 \times 10^{-1}$ | Glottis                             |
| S6_pS235S236                  | $7.6 \times 10^{-3}$  | $1.4 \times 10^{-1}$ | Supraglottis                        |
| ACC_pS79                      | $1.1 \times 10^{-2}$  | $1.9 \times 10^{-1}$ | Supraglottis                        |
| TIGAR                         | $1.2 \times 10^{-2}$  | $2.0 \times 10^{-1}$ | Glottis                             |
| PDL1                          | $1.4 \times 10^{-2}$  | $2.1 \times 10^{-1}$ | Glottis                             |
| RB_pS807S811                  | $1.6 \times 10^{-2}$  | $2.1 \times 10^{-1}$ | Supraglottis                        |
| CABL                          | $1.6 \times 10^{-2}$  | $2.1 \times 10^{-1}$ | Glottis                             |
| CHK2                          | $1.9 \times 10^{-2}$  | $2.3 \times 10^{-1}$ | Supraglottis                        |
| DJ1                           | $2.5 \times 10^{-2}$  | $2.3 \times 10^{-1}$ | Glottis                             |
| MRE11                         | $2.3 \times 10^{-2}$  | $2.3 \times 10^{-1}$ | Glottis                             |
| P27                           | $2.6 \times 10^{-2}$  | $2.3 \times 10^{-1}$ | Glottis                             |
| P38_pT180Y182                 | $2.7 \times 10^{-2}$  | $2.3 \times 10^{-1}$ | Supraglottis                        |
| PEA15                         | $2.5 \times 10^{-2}$  | $2.3 \times 10^{-1}$ | Glottis                             |
| PKCALPHA_pS657                | $2.4 \times 10^{-2}$  | $2.3 \times 10^{-1}$ | Glottis                             |
| S6_pS240S244                  | $2.4 \times 10^{-2}$  | $2.3 \times 10^{-1}$ | Supraglottis                        |
| P27_pT198                     | $2.1 \times 10^{-2}$  | $2.3 \times 10^{-1}$ | Glottis                             |
| TAZ                           | $2.4 \times 10^{-2}$  | $2.3 \times 10^{-1}$ | Glottis                             |
| CK5                           | $3.0 \times 10^{-2}$  | $2.4 \times 10^{-1}$ | Glottis                             |
| HER2                          | $3.3 \times 10^{-2}$  | $2.6 \times 10^{-1}$ | Supraglottis                        |
| YB1_pS102                     | $3.5 \times 10^{-2}$  | $2.6 \times 10^{-1}$ | Supraglottis                        |
| BAP1C4                        | $3.6 \times 10^{-2}$  | $2.7 \times 10^{-1}$ | Supraglottis                        |
| ACVRL1                        | $3.7 \times 10^{-2}$  | $2.7 \times 10^{-1}$ | Glottis                             |
| P62LCKLIGAND                  | $4.0 \times 10^{-2}$  | $2.8 \times 10^{-1}$ | Supraglottis                        |
| NAPSINA                       | $4.2 \times 10^{-2}$  | $2.8 \times 10^{-1}$ | Glottis                             |
| <b>Protein/Phosphoprotein</b> | <b><i>p</i> Value</b> | <b>FDR</b>           | <b>Higher Protein Abundance in?</b> |
| RAB25                         | $4.4 \times 10^{-2}$  | $2.9 \times 10^{-1}$ | Supraglottis                        |
| CYCLINE1                      | $5.0 \times 10^{-2}$  | $3.1 \times 10^{-1}$ | Supraglottis                        |
| PI3KP110ALPHA                 | $5.0 \times 10^{-2}$  | $3.1 \times 10^{-1}$ | Supraglottis                        |
